# Supplementary material
Source: MDPI journal article supplement (https://www.mdpi.com/2410-3888/8/4/179)
Supplement: s1 [file s1]

Table S1. Average nucleotide identity values between the genome of strain V-78 and closely related type strains inferred by the Protologger using FastANI (v1.2) algorithm (Jain et al. 2018)

| Strain code | Type strain                       | ANI(%) |
|-------------|-----------------------------------|--------|
| Strain V-78 | <i>Plesiomonas shigelloides</i>   | 97.1   |
|             | <i>Obesumbacterium proteus</i>    | 78.9   |
|             | <i>Serratia ficaria</i>           | 78.9   |
|             | <i>Pectobacterium parmentieri</i> | 78.7   |
|             | <i>Enterobacter hormaechei</i>    | 78.7   |
|             | <i>Salmonella enterica</i>        | 78.7   |
|             | <i>Cronobacter sakazakii</i>      | 78.7   |
|             | <i>Yersinia entomophaga</i>       | 78.7   |
|             | <i>Yersinia pestis</i>            | 78.6   |
|             | <i>Chania multitudinisentens</i>  | 78.6   |
|             | <i>Sodalis praecaptivus</i>       | 78.6   |
|             | <i>Lonsdalea quercina</i>         | 78.5   |
|             | <i>Serratia quinivorans</i>       | 78.5   |
|             | <i>Enterobacter cloacae</i>       | 78.5   |
|             | <i>Citrobacter amalonaticus</i>   | 78.4   |
|             | <i>Serratia fonticola</i>         | 78.4   |
|             | <i>Serratia proteamaculans</i>    | 78.2   |
|             | <i>Pantoea allii</i>              | 78.1   |
|             | <i>Serratia nematodiphila</i>     | 78.1   |
|             | <i>Klebsiella pneumoniae</i>      | 78.1   |
|             | <i>Hafnia paralvei</i>            | 77.9   |
|             | <i>Citrobacter freundii</i>       | 77.9   |
|             | <i>Rouxiella badensis</i>         | 77.8   |
|             | <i>Citrobacter pasteurii</i>      | 77.8   |
|             | <i>Enterobacter ludwigii</i>      | 77.8   |
|             | <i>Enterobacter soli</i>          | 77.7   |
|             | <i>Serratia marcescens</i>        | 77.6   |
|             | <i>Raoultella planticola</i>      | 77.6   |
|             | <i>Pantoea cypripedii</i>         | 77.6   |
|             | <i>Citrobacter braakii</i>        | 77.5   |
|             | <i>Serratia grimesii</i>          | 77.5   |
|             | <i>Buttiauxella brennerae</i>     | 77.5   |
|             | <i>Buttiauxella noackiae</i>      | 77.5   |
|             | <i>Citrobacter werkmanii</i>      | 77.5   |
|             | <i>Raoultella ornithinolytica</i> | 77.5   |
|             | <i>Rouxiella chamberiensis</i>    | 77.5   |
|             | <i>Buttiauxella ferragutiae</i>   | 77.5   |
|             | <i>Serratia odorifera</i>         | 77.5   |
|             | <i>Buttiauxella gaviniae</i>      | 77.4   |
|             | <i>Pantoea agglomerans</i>        | 77.4   |
|             | <i>Rouxiella silvae</i>           | 77.4   |
|             | <i>Buttiauxella agrestis</i>      | 77.3   |
|             | <i>Dickeya chrysanthemi</i>       | 77.3   |
|             | <i>Pectobacterium carotovorum</i> | 77.3   |
|             | <i>Serratia plymuthica</i>        | 77.2   |
|             | <i>Proteus hauseri</i>            | 76.7   |
