# Supplementary material
Source: MDPI journal article supplement (https://www.mdpi.com/2410-3888/8/4/179)
Supplement: s1 [file s1]

Table S2. Antibiotic resistance models detected in the genomes of *Plesiomonas shigelloides* strains by the ARTS server

| Resistance model ID | Model description     | Genome count |
|---------------------|-----------------------|--------------|
| PF00044.19          | Gp_dh_N               | 19           |
| PF00183.13          | HSP90                 | 19           |
| PF00185.19          | OTCace                | 19           |
| PF00204.20          | DNA_gyraseB           | 19           |
| PF00227.21          | Proteasome            | 19           |
| PF00364.17          | Biotin_lipoyl         | 19           |
| PF00521.15          | DNA_topoisoIV         | 19           |
| PF01039.17          | Carboxyl_trans        | 19           |
| PF13599.1           | Pentapeptide_4        | 16           |
| RF0007              | ABC_efflux            | 18           |
| RF0044              | CARB-PSE              | 18           |
| RF0050              | Chlor_Acetyltrans_CAT | 19           |
| RF0051              | Chlor_Efflux_Pump     | 1            |
| RF0053              | ClassA                | 1            |
| RF0089              | macB                  | 13           |
| RF0098              | MexE                  | 18           |
| RF0099              | MexH                  | 18           |
| RF0100              | MexW-MexI             | 18           |
| RF0104              | MFS_efflux            | 6            |
| RF0113              | Qnr                   | 1            |
| RF0115              | RND_efflux            | 18           |
| RF0134              | tet_MFS_efflux        | 1            |
| TIGR00663           | TIGR00663             | 18           |
| TIGR02013           | TIGR02013             | 18           |
