# Supplementary material
Source: MDPI journal article supplement (https://www.mdpi.com/2410-3888/8/4/179)

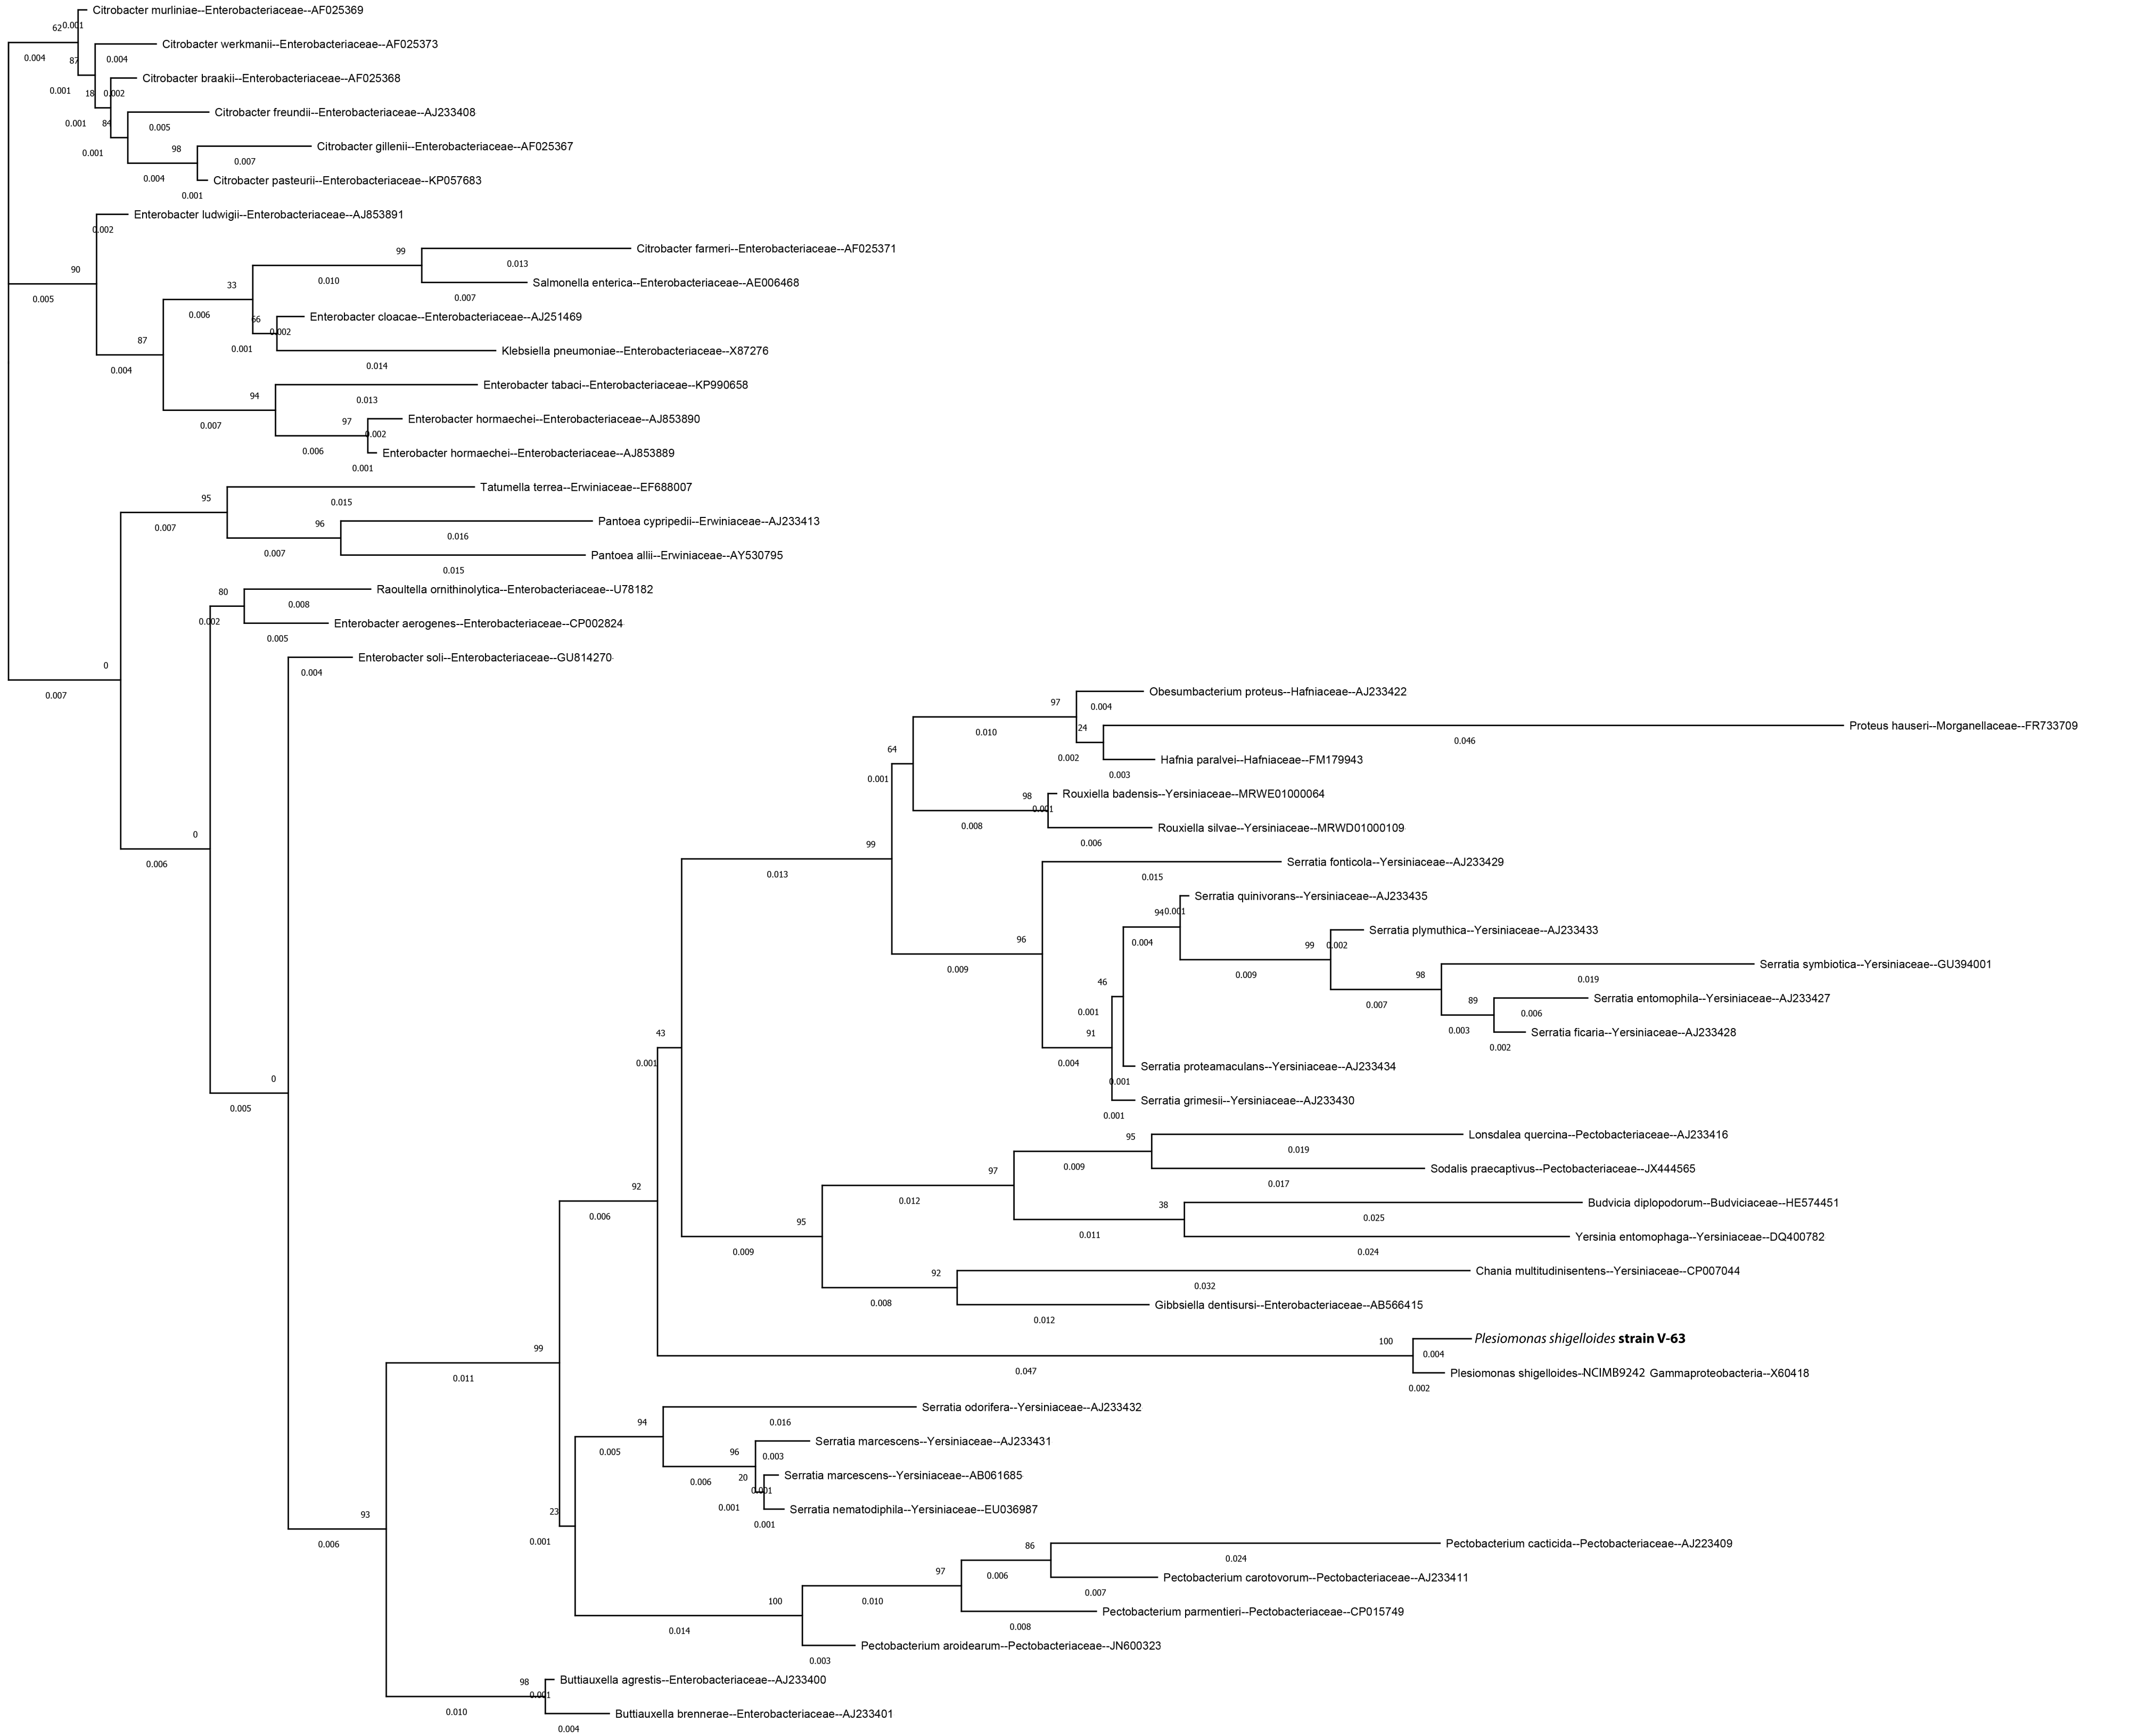

0.020

Supplement: s1 [file s1]

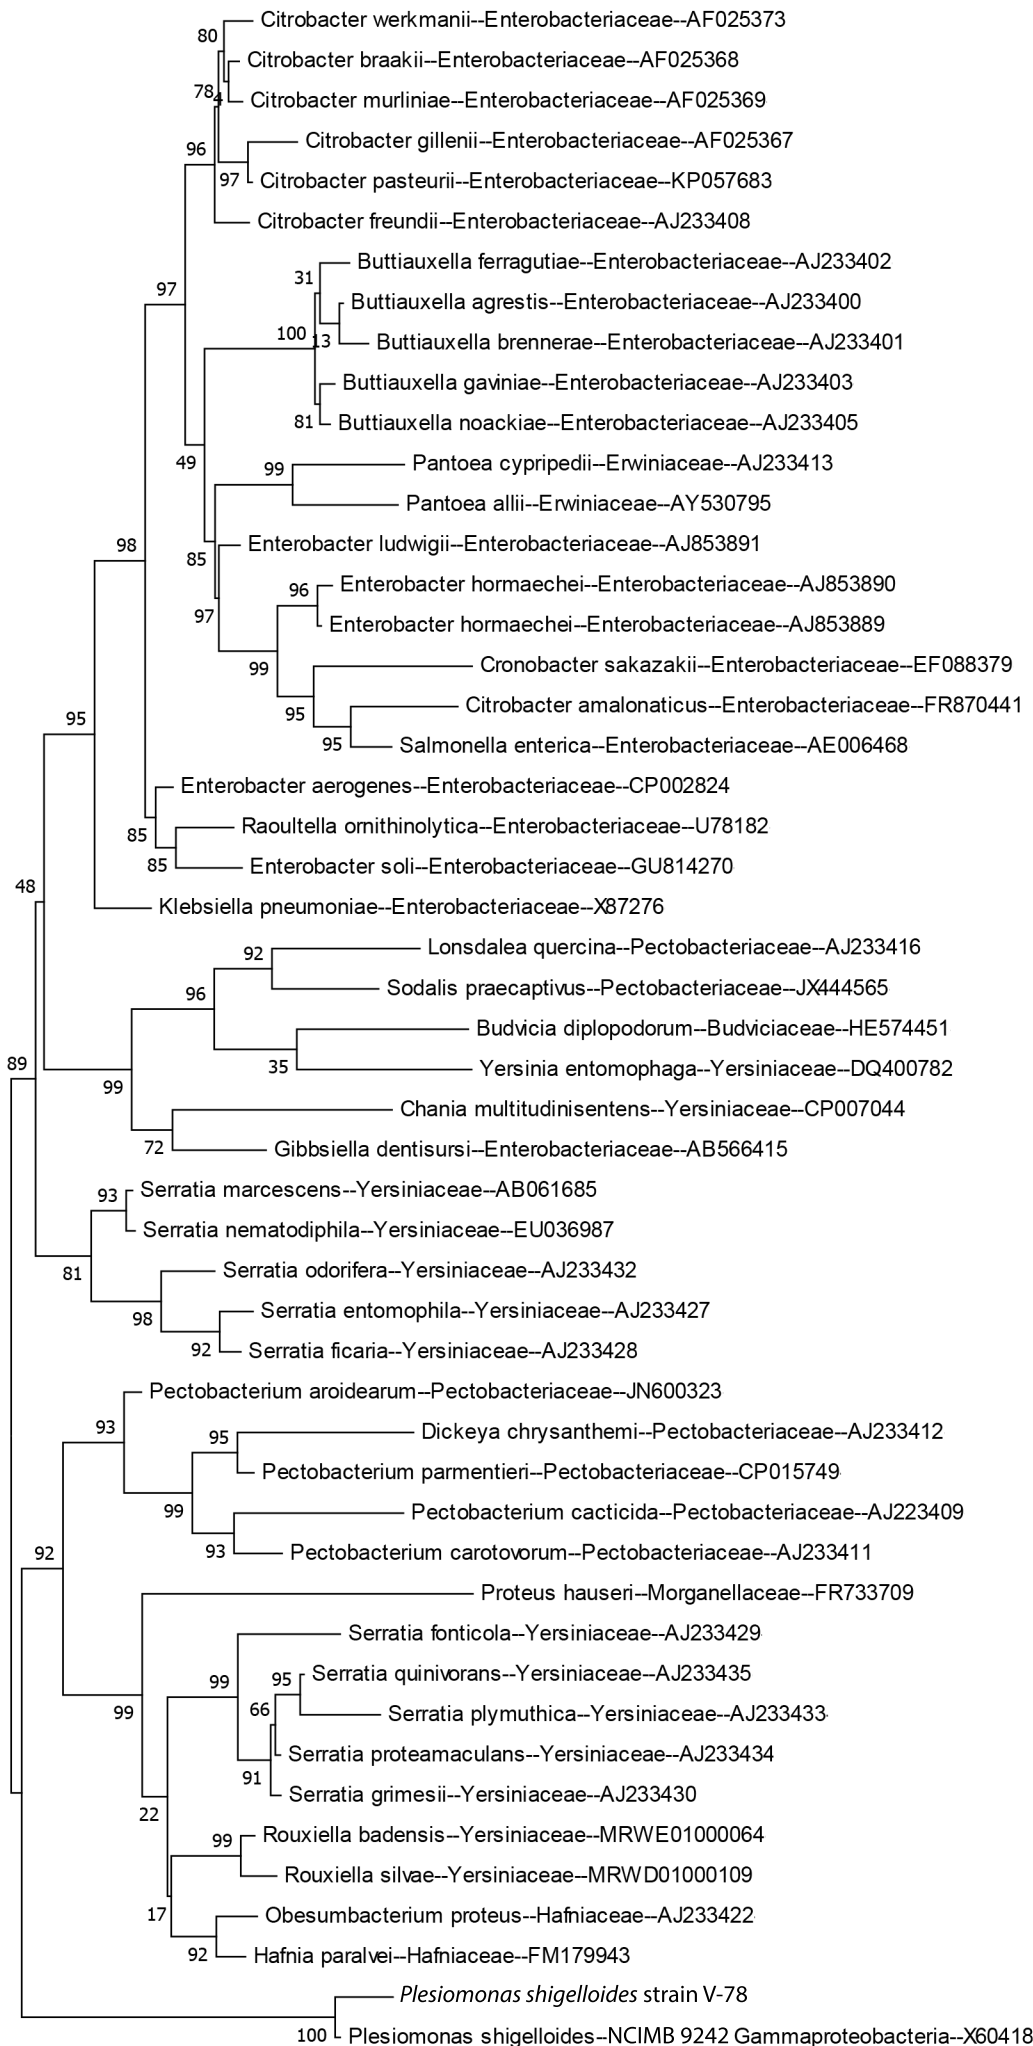

0.0050

Supplement: s1 [file s1]
